# Supplementary material for: Unraveling the Role of Hepatic PGC1α in Breast Cancer Invasion: A New Target for Therapeutic Intervention?
Source: MDPI journal article supplement (doi:10.3390/cells12182311), 2023-09-19
Supplement: s1 [file s1]

# Unraveling the Role of Hepatic PGC1 $\alpha$ in Breast Cancer Invasion: A New Target for Therapeutic Intervention?

Kumar Ganesan<sup>1</sup>, Cong Xu<sup>1</sup>, Qingqing Liu<sup>1</sup>, Yue Sui<sup>1</sup>, Jianping Chen<sup>1,2\*</sup>

<sup>1</sup>School of Chinese Medicine, LKS Faculty of Medicine, The University of Hong Kong, Sassoon Road, Hong Kong, China

<sup>2</sup>Shenzhen Institute of Research and Innovation, The University of Hong Kong, Shenzhen 518057, China

\* Correspondence: abchen@hku.hk; Tel.: +86-852-39176479; Fax: +86-852-28725476

## Supplementary Table S1. Silencing of PGC1 $\alpha$ gene in BC cells by transfection using Lipofectamine RNAiMAX

| S.No | Gene          | Sequence              |                       |
|------|---------------|-----------------------|-----------------------|
|      |               | Sense ( 5'-3' )       | Antisense ( 5'-3' )   |
| 1    | PGC1 $\alpha$ | GCUCGGAGCUUCUCAAUATT  | UAUUUGAGAAGCUCCGAGCTT |
| 2    | PGC1 $\alpha$ | GGACAGUGAUUUCAGUAAUTT | AUUACUGAAAUCACUGUCCTT |
| 3    | PGC1 $\alpha$ | GCACGCAAUCCUAUUCAUUTT | AAUGAAUAGGAUUGCGUGCTT |
| 4    | NC            | UUCUCCGAACGUGUCACGUTT | ACGUGACACGUUCGGAGAATT |

## Supplementary Table S2. List of antibodies used in the study

| Antibodies         | Catalog number | Source | Dilution | Company Name              |
|--------------------|----------------|--------|----------|---------------------------|
| Primary antibodies |                |        |          |                           |
| ACC                | Cat# A15606    | Rabbit | 1:500    | Abclonal                  |
| Akt                | Cat# A18120    | Rabbit | 1:200    | Abclonal                  |
| BAX                | Cat# A19684    | Rabbit | 1:200    | Abclonal                  |
| Bcl2               | Cat# A19693    | Rabbit | 1:200    | Abclonal                  |
| Casp3              | Cat# A17900    | Mouse  | 1:200    | Abclonal                  |
| Casp9              | Cat# A11910    | Rabbit | 1:200    | Abclonal                  |
| Cleaved Casp 3     | Cat# A22869    | Rabbit | 1:200    | Abclonal                  |
| COX-2              | Cat# A1253     | Rabbit | 1:1000   | Abclonal                  |
| CPT1               | Cat# A5307     | Rabbit | 1:500    | Abclonal                  |
| Cyt C              | Cat# A13430    | Rabbit | 1:200    | Abclonal                  |
| E-cad              | Cat# A18135    | Mouse  | 1:200    | Abclonal                  |
| ERK1/2             | Cat# A10613    | Mouse  | 1:200    | Abclonal                  |
| ERR $\alpha$       | Cat#A14184     | Rabbit | 1:50     | Abclonal                  |
| FABP-L             | Cat# A11213    | Rabbit | 1:500    | Abclonal                  |
| FAS                | Cat# A0461     | Rabbit | 1:500    | Abclonal                  |
| GAPDH              | Cat# 2118 s    | Rabbit | 1:1000   | Cell Signaling Technology |
| IL-6               | Cat# A0286     | Rabbit | 1:200    | Abclonal                  |
| Ki67               | Cat# A11390    | Rabbit | 1:200    | Abclonal                  |
| LPL                | Cat# A4115     | Rabbit | 1:200    | Abclonal                  |

|                      |               |        |       |                           |
|----------------------|---------------|--------|-------|---------------------------|
| MMP2                 | Cat# A6247    | Rabbit | 1:200 | Abclonal                  |
| MMP9                 | Cat# A0289    | Rabbit | 1:200 | Abclonal                  |
| mTOR                 | Cat# A2445    | Rabbit | 1:200 | Abclonal                  |
| N-cad                | Cat# A0433    | Rabbit | 1:200 | Abclonal                  |
| NFκB                 | Cat# A3108    | Rabbit | 1:200 | Abclonal                  |
| PARP1                | Cat# A19596   | Rabbit | 1:200 | Abclonal                  |
| PCNA                 | Cat# A12427   | Rabbit | 1:200 | Abclonal                  |
| pERK1/2              | Cat# AP0472   | Rabbit | 1:200 | Abclonal                  |
| PGC1α                | Cat# PA572948 | Rabbit | 1:200 | Life Technologies         |
| PI3K                 | Cat# A19742   | Rabbit | 1:200 | Abclonal                  |
| RAS                  | Cat# A19638   | Rabbit | 1:200 | Abclonal                  |
| SCD1                 | Cat# A16429   | Rabbit | 1:200 | Abclonal                  |
| TNF-α                | Cat# ab183218 | Rabbit | 1:200 | Abcam                     |
| Vimentin             | Cat# A11423   | Rabbit | 1:200 | Abclonal                  |
| α-SMA                | Cat# A17910   | Rabbit | 1:200 | Abclonal                  |
| β-actin              | Cat# ab8226   | Mouse  | 1:500 | Abcam                     |
| β-catenin            | Cat# A11512   | Rabbit | 1:200 | Abclonal                  |
| Secondary antibodies |               |        |       |                           |
| Mouse                | Cat# 7076     | Horse  | 1:500 | Cell Signaling Technology |
| Rabbit               | Cat# 7074     | Goat   | 1:500 | Cell Signaling Technology |
